# Supplementary material
Source: publisher figshare collection journal article supplement (https://acs.figshare.com/ndownloader/files/4743850)
Supplement: Supplementary file 1 [file 4743850]

  
data_60914f 
  
_audit_creation_method            SHELXL-97 
_chemical_name_systematic 
; 
 ? 
; 
_chemical_name_common             ? 
_chemical_melting_point           ? 
_chemical_formula_moiety          ? 
_chemical_formula_sum 
 'C18 H16 Br F3 O4' 
_chemical_formula_weight          433.22 
_chemical_absolute_configuration  ad
  
loop_ 
 _atom_type_symbol 
 _atom_type_description 
 _atom_type_scat_dispersion_real 
 _atom_type_scat_dispersion_imag 
 _atom_type_scat_source 
 'C'  'C'   0.0033   0.0000 
 'International Tables Vol C Tables 4.2.6.8 and 6.1.1.4' 
 'H'  'H'   0.0000   0.0000 
 'International Tables Vol C Tables 4.2.6.8 and 6.1.1.4' 
 'F'  'F'   0.0171   0.0000 
 'International Tables Vol C Tables 4.2.6.8 and 6.1.1.4' 
 'O'  'O'   0.0106   0.0000 
 'International Tables Vol C Tables 4.2.6.8 and 6.1.1.4' 
 'Br'  'Br'  -0.2901   0.0000 
 'International Tables Vol C Tables 4.2.6.8 and 6.1.1.4' 
  
_symmetry_cell_setting            Orthorhombic 
_symmetry_space_group_name_H-M    P2(1)2(1)2(1) 
  
loop_ 
 _symmetry_equiv_pos_as_xyz 
 'x, y, z' 
 '-x+1/2, -y, z+1/2' 
 '-x, y+1/2, -z+1/2' 
 'x+1/2, -y+1/2, -z' 
  
_cell_length_a                    5.9829(11) 
_cell_length_b                    7.2720(14) 
_cell_length_c                    41.691(8) 
_cell_angle_alpha                 90.00 
_cell_angle_beta                  90.00 
_cell_angle_gamma                 90.00 
_cell_volume                      1813.9(6) 
_cell_formula_units_Z             4 
_cell_measurement_temperature     294(2) 
_cell_measurement_reflns_used     4869 
_cell_measurement_theta_min       2.84 
_cell_measurement_theta_max       26.22 
  
_exptl_crystal_description        block 
_exptl_crystal_colour             colorless
_exptl_crystal_size_max           0.28 
_exptl_crystal_size_mid           0.24 
_exptl_crystal_size_min           0.20 
_exptl_crystal_density_meas       NONE 
_exptl_crystal_density_diffrn     1.586 
_exptl_crystal_density_method     'not measured' 
_exptl_crystal_F_000              872 
_exptl_absorpt_coefficient_mu     2.316 
_exptl_absorpt_correction_type    MULTI-SCAN 
_exptl_absorpt_correction_T_min   0.5633 
_exptl_absorpt_correction_T_max   0.6545 
_exptl_absorpt_process_details    SADABS 
  
_exptl_special_details 
; 
 ? 
; 
  
_diffrn_ambient_temperature       294(2) 
_diffrn_radiation_wavelength      0.71073 
_diffrn_radiation_type            MoK\a 
_diffrn_radiation_source          'fine-focus sealed tube' 
_diffrn_radiation_monochromator   graphite 
_diffrn_measurement_device_type   'CCD area detector' 
_diffrn_measurement_method        'phi and omega scans' 
_diffrn_detector_area_resol_mean  ? 
_diffrn_standards_number          . 
_diffrn_standards_interval_count  . 
_diffrn_standards_interval_time   . 
_diffrn_standards_decay_%         . 
_diffrn_reflns_number             9970 
_diffrn_reflns_av_R_equivalents   0.0512 
_diffrn_reflns_av_sigmaI/netI     0.0436 
_diffrn_reflns_limit_h_min        -4 
_diffrn_reflns_limit_h_max        7 
_diffrn_reflns_limit_k_min        -9 
_diffrn_reflns_limit_k_max        8 
_diffrn_reflns_limit_l_min        -52 
_diffrn_reflns_limit_l_max        50 
_diffrn_reflns_theta_min          1.95 
_diffrn_reflns_theta_max          26.37 
_reflns_number_total              2196 
_reflns_number_gt                 1972 
_reflns_threshold_expression      >2sigma(I) 
  
_computing_data_collection        'Bruker SMART' 
_computing_cell_refinement        'Bruker SMART' 
_computing_data_reduction         'Bruker SAINT' 
_computing_structure_solution     'SHELXS-97 (Sheldrick, 1990)' 
_computing_structure_refinement   'SHELXL-97 (Sheldrick, 1997)' 
_computing_molecular_graphics     'Bruker SHELXTL' 
_computing_publication_material   'Bruker SHELXTL' 
  
_refine_special_details 
; 
 Refinement of F^2^ against ALL reflections.  The weighted R-factor wR and 
 goodness of fit S are based on F^2^, conventional R-factors R are based 
 on F, with F set to zero for negative F^2^. The threshold expression of 
 F^2^ > 2sigma(F^2^) is used only for calculating R-factors(gt) etc. and is 
 not relevant to the choice of reflections for refinement.  R-factors based 
 on F^2^ are statistically about twice as large as those based on F, and R- 
 factors based on ALL data will be even larger. 
; 
  
_refine_ls_structure_factor_coef  Fsqd 
_refine_ls_matrix_type            full 
_refine_ls_weighting_scheme       calc 
_refine_ls_weighting_details 
 'calc w=1/[\s^2^(Fo^2^)+(0.1200P)^2^+1.9348P] where P=(Fo^2^+2Fc^2^)/3' 
_atom_sites_solution_primary      direct 
_atom_sites_solution_secondary    difmap 
_atom_sites_solution_hydrogens    geom 
_refine_ls_hydrogen_treatment     CONSTR 
_refine_ls_extinction_method      none 
_refine_ls_extinction_coef        ? 
_refine_ls_abs_structure_details 
 'Flack H D (1983), Acta Cryst. A39, 876-881' 
_refine_ls_abs_structure_Flack    0(10) 
_refine_ls_number_reflns          2196 
_refine_ls_number_parameters      237 
_refine_ls_number_restraints      0 
_refine_ls_R_factor_all           0.0578 
_refine_ls_R_factor_gt            0.0510 
_refine_ls_wR_factor_ref          0.1776 
_refine_ls_wR_factor_gt           0.1723 
_refine_ls_goodness_of_fit_ref    1.026 
_refine_ls_restrained_S_all       1.026 
_refine_ls_shift/su_max           0.001 
_refine_ls_shift/su_mean          0.000 
  
loop_ 
 _atom_site_label 
 _atom_site_type_symbol 
 _atom_site_fract_x 
 _atom_site_fract_y 
 _atom_site_fract_z 
 _atom_site_U_iso_or_equiv 
 _atom_site_adp_type 
 _atom_site_occupancy 
 _atom_site_symmetry_multiplicity 
 _atom_site_calc_flag 
 _atom_site_refinement_flags 
 _atom_site_disorder_assembly 
 _atom_site_disorder_group 
Br1 Br 0.02033(18) 1.07750(12) 0.99462(2) 0.0696(3) Uani 1 1 d . . . 
F1 F 0.9122(9) -0.4757(6) 0.81736(13) 0.0703(14) Uani 1 1 d . . . 
F2 F 0.8141(9) -0.4220(6) 0.86629(10) 0.0574(11) Uani 1 1 d . . . 
F3 F 0.5977(7) -0.3450(6) 0.82748(10) 0.0549(11) Uani 1 1 d . . . 
O1 O 0.4656(9) 0.3497(6) 0.91366(10) 0.0466(11) Uani 1 1 d . . . 
O2 O 1.1414(7) -0.2056(7) 0.84962(12) 0.0457(11) Uani 1 1 d . . . 
H2 H 1.2244 -0.1169 0.8472 0.068 Uiso 1 1 calc R . . 
O3 O 1.1458(11) -0.0298(13) 0.79427(15) 0.094(3) Uani 1 1 d . . . 
O4 O 0.7991(9) -0.1227(9) 0.78205(11) 0.0559(14) Uani 1 1 d . . . 
C1 C 0.0209(12) 0.5965(9) 0.94160(17) 0.0478(15) Uani 1 1 d . . . 
H1 H -0.0769 0.4989 0.9383 0.057 Uiso 1 1 calc R . . 
C2 C -0.0359(12) 0.7388(10) 0.96292(16) 0.0480(15) Uani 1 1 d . . . 
H2A H -0.1693 0.7342 0.9743 0.058 Uiso 1 1 calc R . . 
C3 C 0.1055(12) 0.8828(8) 0.96671(15) 0.0401(14) Uani 1 1 d . . . 
C4 C 0.3084(12) 0.8911(10) 0.95103(17) 0.0489(16) Uani 1 1 d . . . 
H4 H 0.4051 0.9894 0.9544 0.059 Uiso 1 1 calc R . . 
C5 C 0.3661(12) 0.7487(9) 0.92996(17) 0.0467(16) Uani 1 1 d . . . 
H5 H 0.5011 0.7530 0.9189 0.056 Uiso 1 1 calc R . . 
C6 C 0.2235(11) 0.6027(9) 0.92559(14) 0.0394(13) Uani 1 1 d . . . 
C7 C 0.2803(12) 0.4566(9) 0.90126(16) 0.0457(15) Uani 1 1 d . . . 
H7A H 0.1520 0.3777 0.8976 0.055 Uiso 1 1 calc R . . 
H7B H 0.3215 0.5132 0.8810 0.055 Uiso 1 1 calc R . . 
C8 C 0.5644(11) 0.2273(8) 0.89323(14) 0.0370(13) Uani 1 1 d . . . 
C9 C 0.4997(12) 0.1901(8) 0.86217(15) 0.0431(14) Uani 1 1 d . . . 
H9 H 0.3766 0.2508 0.8536 0.052 Uiso 1 1 calc R . . 
C10 C 0.6132(11) 0.0651(9) 0.84361(15) 0.0401(13) Uani 1 1 d . . . 
H10 H 0.5645 0.0407 0.8229 0.048 Uiso 1 1 calc R . . 
C11 C 0.8013(10) -0.0255(8) 0.85563(14) 0.0337(12) Uani 1 1 d . . . 
C12 C 0.8665(11) 0.0098(9) 0.88714(15) 0.0387(13) Uani 1 1 d . . . 
H12 H 0.9897 -0.0506 0.8958 0.046 Uiso 1 1 calc R . . 
C13 C 0.7502(11) 0.1327(8) 0.90538(15) 0.0377(13) Uani 1 1 d . . . 
H13 H 0.7953 0.1542 0.9264 0.045 Uiso 1 1 calc R . . 
C14 C 0.9317(10) -0.1682(9) 0.83521(14) 0.0363(13) Uani 1 1 d . . . 
C15 C 0.8128(12) -0.3552(10) 0.83633(15) 0.0432(15) Uani 1 1 d . . . 
C16 C 0.9713(12) -0.1009(10) 0.80144(17) 0.0500(16) Uani 1 1 d . . . 
C17 C 0.8177(18) -0.0528(18) 0.74919(18) 0.080(3) Uani 1 1 d . . . 
H17A H 0.9525 -0.0994 0.7391 0.096 Uiso 1 1 calc R . . 
H17B H 0.8244 0.0805 0.7493 0.096 Uiso 1 1 calc R . . 
C18 C 0.617(2) -0.1164(18) 0.7312(2) 0.095(4) Uani 1 1 d . . . 
H18A H 0.4851 -0.0621 0.7404 0.142 Uiso 1 1 calc R . . 
H18B H 0.6061 -0.2479 0.7325 0.142 Uiso 1 1 calc R . . 
H18C H 0.6291 -0.0801 0.7091 0.142 Uiso 1 1 calc R . . 
  
loop_ 
 _atom_site_aniso_label 
 _atom_site_aniso_U_11 
 _atom_site_aniso_U_22 
 _atom_site_aniso_U_33 
 _atom_site_aniso_U_23 
 _atom_site_aniso_U_13 
 _atom_site_aniso_U_12 
Br1 0.0895(7) 0.0606(5) 0.0586(5) -0.0238(3) 0.0011(4) 0.0176(5) 
F1 0.081(3) 0.046(2) 0.083(3) -0.018(2) 0.022(3) 0.009(2) 
F2 0.071(3) 0.051(2) 0.050(2) 0.0090(19) 0.003(2) -0.010(2) 
F3 0.049(2) 0.055(2) 0.061(2) -0.009(2) -0.0047(19) -0.016(2) 
O1 0.059(3) 0.042(2) 0.039(2) -0.0078(18) -0.002(2) 0.015(2) 
O2 0.030(2) 0.058(3) 0.049(2) 0.001(2) 0.002(2) 0.004(2) 
O3 0.058(3) 0.161(8) 0.064(3) 0.046(5) 0.006(3) -0.027(5) 
O4 0.059(3) 0.078(4) 0.030(2) 0.006(2) 0.003(2) -0.003(3) 
C1 0.047(4) 0.042(3) 0.054(4) -0.006(3) 0.008(3) -0.008(3) 
C2 0.040(3) 0.056(4) 0.048(3) -0.005(3) 0.007(3) -0.004(3) 
C3 0.051(4) 0.031(3) 0.038(3) -0.003(2) -0.003(3) 0.007(3) 
C4 0.044(4) 0.046(4) 0.056(4) -0.014(3) 0.002(3) -0.005(3) 
C5 0.038(3) 0.053(4) 0.049(4) -0.014(3) 0.009(3) -0.007(3) 
C6 0.038(3) 0.043(3) 0.037(3) 0.001(3) 0.001(2) 0.003(3) 
C7 0.048(4) 0.041(3) 0.048(3) -0.009(3) 0.000(3) 0.002(3) 
C8 0.043(3) 0.031(3) 0.037(3) 0.001(2) -0.002(2) -0.001(3) 
C9 0.038(3) 0.042(3) 0.049(3) -0.001(2) -0.010(3) 0.004(3) 
C10 0.039(3) 0.044(3) 0.037(3) -0.006(3) -0.010(2) 0.000(3) 
C11 0.031(3) 0.031(3) 0.039(3) -0.001(2) -0.001(2) -0.003(2) 
C12 0.039(3) 0.036(3) 0.041(3) 0.005(3) -0.005(3) 0.006(3) 
C13 0.044(3) 0.033(3) 0.036(3) -0.004(2) -0.010(3) 0.001(3) 
C14 0.027(3) 0.043(3) 0.040(3) -0.001(3) 0.003(2) 0.005(2) 
C15 0.050(4) 0.043(3) 0.037(3) -0.007(3) 0.011(3) -0.001(3) 
C16 0.043(3) 0.052(4) 0.055(4) -0.001(3) 0.015(3) -0.007(4) 
C17 0.078(6) 0.117(8) 0.045(4) 0.025(5) 0.007(4) 0.014(6) 
C18 0.119(9) 0.106(8) 0.060(5) 0.000(6) -0.019(6) 0.016(8) 
  
_geom_special_details 
; 
 All esds (except the esd in the dihedral angle between two l.s. planes) 
 are estimated using the full covariance matrix.  The cell esds are taken 
 into account individually in the estimation of esds in distances, angles 
 and torsion angles; correlations between esds in cell parameters are only 
 used when they are defined by crystal symmetry.  An approximate (isotropic) 
 treatment of cell esds is used for estimating esds involving l.s. planes. 
; 
  
loop_ 
 _geom_bond_atom_site_label_1 
 _geom_bond_atom_site_label_2 
 _geom_bond_distance 
 _geom_bond_site_symmetry_2 
 _geom_bond_publ_flag 
Br1 C3 1.902(6) . ? 
F1 C15 1.322(8) . ? 
F2 C15 1.340(8) . ? 
F3 C15 1.341(9) . ? 
O1 C8 1.366(7) . ? 
O1 C7 1.450(8) . ? 
O2 C14 1.418(7) . ? 
O2 H2 0.8200 . ? 
O3 C16 1.203(10) . ? 
O4 C16 1.320(9) . ? 
O4 C17 1.465(9) . ? 
C1 C6 1.385(9) . ? 
C1 C2 1.406(9) . ? 
C1 H1 0.9300 . ? 
C2 C3 1.355(10) . ? 
C2 H2A 0.9300 . ? 
C3 C4 1.380(10) . ? 
C4 C5 1.401(9) . ? 
C4 H4 0.9300 . ? 
C5 C6 1.374(9) . ? 
C5 H5 0.9300 . ? 
C6 C7 1.508(9) . ? 
C7 H7A 0.9700 . ? 
C7 H7B 0.9700 . ? 
C8 C9 1.378(9) . ? 
C8 C13 1.402(9) . ? 
C9 C10 1.373(9) . ? 
C9 H9 0.9300 . ? 
C10 C11 1.397(9) . ? 
C10 H10 0.9300 . ? 
C11 C12 1.394(8) . ? 
C11 C14 1.553(8) . ? 
C12 C13 1.364(9) . ? 
C12 H12 0.9300 . ? 
C13 H13 0.9300 . ? 
C14 C16 1.509(9) . ? 
C14 C15 1.535(9) . ? 
C17 C18 1.491(16) . ? 
C17 H17A 0.9700 . ? 
C17 H17B 0.9700 . ? 
C18 H18A 0.9600 . ? 
C18 H18B 0.9600 . ? 
C18 H18C 0.9600 . ? 
  
loop_ 
 _geom_angle_atom_site_label_1 
 _geom_angle_atom_site_label_2 
 _geom_angle_atom_site_label_3 
 _geom_angle 
 _geom_angle_site_symmetry_1 
 _geom_angle_site_symmetry_3 
 _geom_angle_publ_flag 
C8 O1 C7 117.3(5) . . ? 
C14 O2 H2 109.5 . . ? 
C16 O4 C17 118.1(7) . . ? 
C6 C1 C2 119.5(6) . . ? 
C6 C1 H1 120.3 . . ? 
C2 C1 H1 120.3 . . ? 
C3 C2 C1 119.5(6) . . ? 
C3 C2 H2A 120.3 . . ? 
C1 C2 H2A 120.3 . . ? 
C2 C3 C4 121.8(6) . . ? 
C2 C3 Br1 118.6(5) . . ? 
C4 C3 Br1 119.5(5) . . ? 
C3 C4 C5 118.8(7) . . ? 
C3 C4 H4 120.6 . . ? 
C5 C4 H4 120.6 . . ? 
C6 C5 C4 120.1(6) . . ? 
C6 C5 H5 120.0 . . ? 
C4 C5 H5 120.0 . . ? 
C5 C6 C1 120.3(6) . . ? 
C5 C6 C7 119.6(6) . . ? 
C1 C6 C7 119.9(6) . . ? 
O1 C7 C6 108.1(5) . . ? 
O1 C7 H7A 110.1 . . ? 
C6 C7 H7A 110.1 . . ? 
O1 C7 H7B 110.1 . . ? 
C6 C7 H7B 110.1 . . ? 
H7A C7 H7B 108.4 . . ? 
O1 C8 C9 126.3(6) . . ? 
O1 C8 C13 116.0(5) . . ? 
C9 C8 C13 117.7(6) . . ? 
C10 C9 C8 121.4(6) . . ? 
C10 C9 H9 119.3 . . ? 
C8 C9 H9 119.3 . . ? 
C9 C10 C11 120.5(6) . . ? 
C9 C10 H10 119.7 . . ? 
C11 C10 H10 119.7 . . ? 
C12 C11 C10 118.5(6) . . ? 
C12 C11 C14 119.9(5) . . ? 
C10 C11 C14 121.6(5) . . ? 
C13 C12 C11 120.2(6) . . ? 
C13 C12 H12 119.9 . . ? 
C11 C12 H12 119.9 . . ? 
C12 C13 C8 121.6(6) . . ? 
C12 C13 H13 119.2 . . ? 
C8 C13 H13 119.2 . . ? 
O2 C14 C16 108.6(5) . . ? 
O2 C14 C15 103.2(5) . . ? 
C16 C14 C15 112.9(5) . . ? 
O2 C14 C11 109.9(5) . . ? 
C16 C14 C11 111.9(5) . . ? 
C15 C14 C11 110.0(5) . . ? 
F1 C15 F2 108.3(6) . . ? 
F1 C15 F3 107.6(6) . . ? 
F2 C15 F3 106.4(6) . . ? 
F1 C15 C14 111.1(5) . . ? 
F2 C15 C14 110.3(5) . . ? 
F3 C15 C14 112.8(6) . . ? 
O3 C16 O4 125.3(7) . . ? 
O3 C16 C14 120.5(7) . . ? 
O4 C16 C14 114.2(6) . . ? 
O4 C17 C18 107.5(9) . . ? 
O4 C17 H17A 110.2 . . ? 
C18 C17 H17A 110.2 . . ? 
O4 C17 H17B 110.2 . . ? 
C18 C17 H17B 110.2 . . ? 
H17A C17 H17B 108.5 . . ? 
C17 C18 H18A 109.5 . . ? 
C17 C18 H18B 109.5 . . ? 
H18A C18 H18B 109.5 . . ? 
C17 C18 H18C 109.5 . . ? 
H18A C18 H18C 109.5 . . ? 
H18B C18 H18C 109.5 . . ? 
  
loop_ 
 _geom_torsion_atom_site_label_1 
 _geom_torsion_atom_site_label_2 
 _geom_torsion_atom_site_label_3 
 _geom_torsion_atom_site_label_4 
 _geom_torsion 
 _geom_torsion_site_symmetry_1 
 _geom_torsion_site_symmetry_2 
 _geom_torsion_site_symmetry_3 
 _geom_torsion_site_symmetry_4 
 _geom_torsion_publ_flag 
C6 C1 C2 C3 2.1(10) . . . . ? 
C1 C2 C3 C4 -2.3(10) . . . . ? 
C1 C2 C3 Br1 177.9(5) . . . . ? 
C2 C3 C4 C5 1.8(10) . . . . ? 
Br1 C3 C4 C5 -178.5(5) . . . . ? 
C3 C4 C5 C6 -1.0(11) . . . . ? 
C4 C5 C6 C1 0.9(10) . . . . ? 
C4 C5 C6 C7 176.0(7) . . . . ? 
C2 C1 C6 C5 -1.4(10) . . . . ? 
C2 C1 C6 C7 -176.5(6) . . . . ? 
C8 O1 C7 C6 -170.6(5) . . . . ? 
C5 C6 C7 O1 71.6(8) . . . . ? 
C1 C6 C7 O1 -113.2(7) . . . . ? 
C7 O1 C8 C9 -2.7(10) . . . . ? 
C7 O1 C8 C13 176.9(6) . . . . ? 
O1 C8 C9 C10 179.3(6) . . . . ? 
C13 C8 C9 C10 -0.3(10) . . . . ? 
C8 C9 C10 C11 -1.2(10) . . . . ? 
C9 C10 C11 C12 1.9(9) . . . . ? 
C9 C10 C11 C14 179.6(6) . . . . ? 
C10 C11 C12 C13 -1.1(9) . . . . ? 
C14 C11 C12 C13 -178.8(6) . . . . ? 
C11 C12 C13 C8 -0.4(10) . . . . ? 
O1 C8 C13 C12 -178.6(6) . . . . ? 
C9 C8 C13 C12 1.1(10) . . . . ? 
C12 C11 C14 O2 -16.4(8) . . . . ? 
C10 C11 C14 O2 165.9(5) . . . . ? 
C12 C11 C14 C16 -137.1(6) . . . . ? 
C10 C11 C14 C16 45.2(8) . . . . ? 
C12 C11 C14 C15 96.6(7) . . . . ? 
C10 C11 C14 C15 -81.1(7) . . . . ? 
O2 C14 C15 F1 -67.1(7) . . . . ? 
C16 C14 C15 F1 49.9(8) . . . . ? 
C11 C14 C15 F1 175.7(5) . . . . ? 
O2 C14 C15 F2 53.1(6) . . . . ? 
C16 C14 C15 F2 170.1(6) . . . . ? 
C11 C14 C15 F2 -64.1(7) . . . . ? 
O2 C14 C15 F3 171.9(5) . . . . ? 
C16 C14 C15 F3 -71.1(7) . . . . ? 
C11 C14 C15 F3 54.7(7) . . . . ? 
C17 O4 C16 O3 -1.1(13) . . . . ? 
C17 O4 C16 C14 176.9(7) . . . . ? 
O2 C14 C16 O3 -24.6(11) . . . . ? 
C15 C14 C16 O3 -138.3(9) . . . . ? 
C11 C14 C16 O3 96.9(9) . . . . ? 
O2 C14 C16 O4 157.3(6) . . . . ? 
C15 C14 C16 O4 43.5(8) . . . . ? 
C11 C14 C16 O4 -81.3(7) . . . . ? 
C16 O4 C17 C18 172.5(8) . . . . ? 
  
_diffrn_measured_fraction_theta_max    0.994 
_diffrn_reflns_theta_full              26.37 
_diffrn_measured_fraction_theta_full   0.994 
_refine_diff_density_max    0.344 
_refine_diff_density_min   -0.731 
_refine_diff_density_rms    0.069 
  
  
